# Supplementary material for: The Role of Pre-injury Polysubstance Use on Traumatic Brain Injury and its Impact on Health Resource Utilization Among the U.S. Trauma Patients
Source: Research Square preprint supplement (doi:10.21203/rs.3.rs-6017336/v1), 2025-07-22
Supplement: Supplementary file 1 [file 74b2ca89b8879acabf2692db.docx]

Table S1: Baseline Characteristics of Isolated Traumatic Brain Injury Patients for Polysubstance by Type.

| Characteristics | NS, N = 75,624 (63.38) | C, N = 15,201 (12.74) | D, N = 3,054 (2.56) | O, N = 3,137 (2.63) | S, N = 9,031 (7.57) | CD, N = 1260 (1.06) | CO, N = 1040 (0.87) | CS, N = 5,346 (4.48) | OD, N = 725 (0.61) | SD, N = 1,704 (1.43) | SO, N = 1,104 (0.96) | COD, N = 266 (0.22) | CSD, N = 605 (0.51) | CSO, N = 633 (0.53) | SOD, N = 283 (0.24) | CSOD, N = 267 (0.22) | p-value |
| --- | --- | --- | --- | --- | --- | --- | --- | --- | --- | --- | --- | --- | --- | --- | --- | --- | --- |
| **Sex, n(%)** |  |  |  |  |  |  |  |  |  |  |  |  |  |  |  |  | **<0.0001** |
| Male | 49,745  (65.78) | 11,835 (77.86) | 2,048 (67.06) | 1,915 (61.05) | 6,991 (77.41) | 970 (76.98) | 783 (75.29) | 4,312 (80.66) | 432 (59.59) | 1,151 (67.55) | 863 (75.70) | 190 (71.43) | 457 (75.54) | 494 (78.04) | 189 (66.78) | 193 (72.28) |  |
| Female | 25,872 (34.21) | 3,362 (22.12) | 1,006 (32.94) | 1,222 (38.95) | 2,040 (22.59) | 290 (23.02) | 256 (24.62) | 1,034 (19.34) | 293 (40.41) | 552 (32.39) | 277 (24.30) | 76 (28.57) | 148 (24.46) | 139 (21.96) | 94 (33.22) | 74 (27.72) |  |
| Missing | 7 (0.01) | 4 (0.03) | 0 | 0 | 0 | 0 | 1 (0.10) | 0 | 0 | 1 (0.06) | 0 | 0 | 0 | 0 | 0 | 0 |  |
| **Age, n(%)** |  |  |  |  |  |  |  |  |  |  |  |  |  |  |  |  | **<0.0001** |
| 18 - 27 | 12,844 (16.98) | 6,268 (41.23) | 384 (12.57) | 458 (14.60) | 1,494 (16.54) | 536 (42.54) | 360 (34.62) | 1,641 (30.70) | 71 (9.79) | 362 (21.24) | 154 (13.51) | 90 (33.83) | 245 (40.50) | 171 (27.01) | 43 (15.19) | 79 (29.59) |  |
| 28 - 43 | 15,899 (21.02) | 4,782 (31.46) | 705 (23.08) | 698 (22.25) | 3,350 (37.09) | 390 (30.95) | 366 (35.19) | 2,233 (41.77) | 173 (23.86) | 585 (34.33) | 493 (43.25) | 95 (35.71) | 249 (41.16) | 304 (48.03) | 133 (47.00) | 108 (40.45) |  |
| 44 - 64 | 23,372 (30.91) | 3,423 (22.52) | 1,220 (39.95) | 1,090 (34.75) | 3,629 (40.18) | 283 (22.46) | 257 (24.71) | 1,378 (25.78) | 321 (44.28) | 553 (32.45) | 456 (40.00) | 69 (25.94) | 104 (17.19) | 147 (23.22) | 96 (33.92) | 68 (25.47) |  |
| ≥65 | 23,509 (31.09) | 728 (4.79) | 745 (24.39) | 891 (28.40) | 558 (6.18) | 51 (4.05) | 57 (5.48) | 94 (1.76) | 160 (22.07) | 204 (11.97) | 37 (3.25) | 12 (4.51) | 7 (1.16) | 11 (1.74) | 11 (3.89) | 12 (4.49) |  |
| **Race, n(%)** |  |  |  |  |  |  |  |  |  |  |  |  |  |  |  |  | **<0.0001** |
| Asian | 2,471 (3.27) | 147 (0.97) | 59 (1.93) | 66 (2.10) | 144 (1.59) | 5 (0.40) | 5 (0.48) | 54 (1.01) | 7 (0.97) | 17 (1.00) | 12 (1.05) | 2 (0.75) | 5 (0.83) | 5 (0.79) | 0 | 3 (1.12) |  |
| Pacific Islander | 281 (0.37) | 54 (0.36) | 7 (0.23) | 6 (0.19) | 45 (0.50) | 3 (0.24) | 1 (0.10) | 38 (0.71) | 1 (0.14) | 4 (0.23) | 2 (0.18) | 3 (1.13) | 2 (0.33) | 1 (0.16) | 1 (0.35) | 1 (0.37) |  |
| Other | 8,058 (10.66) | 1,274 (8.38) | 224 (7.33) | 234 (7.46) | 1,077 (11.93) | 86 (6.83) | 85 (8.17) | 499 (9.33) | 37 (5.10) | 72 (4.23) | 88 (7.72) | 19 (7.14) | 52 (8.60) | 39 (6.16) | 20 (7.07) | 10 (3.75) |  |
| American Indian | 716 (0.95) | 253 (1.66) | 36 (1.18) | 28 (0.89) | 130 (1.44) | 19 (1.51) | 14 (1.35) | 112 (2.10) | 3 (0.41) | 5 (0.29) | 21 (1.84) | 3 (1.13) | 7 (1.16) | 15 (2.37) | 4 (1.41) | 3 (1.12) |  |
| Black | 10,317 (13.64) | 4,245 (27.93) | 299 (9.79) | 459 (14.63) | 1,959 (21.69) | 252 (20.00) | 301 (28.94) | 1,243 (23.25) | 71 (9.79) | 258 (15.14) | 229 (20.09) | 41 (15.41) | 81 (13.39) | 143 (22.59) | 38 (13.43) | 36 (13.48) |  |
| White | 52,493 (69.41) | 8,948 (58.86) | 2,369 (77.57) | 2,301 (73.35) | 5,490 (60.79) | 866 (68.73) | 617 (59.33) | 3,297 (61.67) | 598 (82.48) | 1,332 (78.17) | 763 (66.93) | 192 (72.18) | 449 (74.21) | 415 (65.56) | 209 (73.85) | 206 (77.15) |  |
| Missing | 1,288 (1.70) | 280 (1.84) | 60 (1.96) | 43 (1.37) | 186 (2.06) | 29 (2.30) | 17 (1.63) | 103 (1.93) | 8 (1.10) | 16 (0.94) | 25 (2.19) | 6 (2.26) | 9 (1.49) | 15 (2.37) | 11 (3.89) | 8 (3.00) |  |
| **Ethnicity, n(%)** |  |  |  |  |  |  |  |  |  |  |  |  |  |  |  |  | **<0.0001** |
| Hispanic/Latino | 10,776 (14.25) | 1,880 (12.37) | 346 (11.33) | 366 (11.67) | 1,731 (19.17) | 142 (11.27) | 117 (11.25) | 841 (15.73) | 47 (6.48) | 128 (7.51) | 155 (13.60) | 28 (10.53) | 89 (14.71) | 72 (11.37) | 34 (12.01) | 12 (4.49) |  |
| Non-Hispanic/Latino | 61,767 (81.68) | 12,785 (84.11) | 2,595 (84.97) | 2,674 (85.24) | 7,023 (77.77) | 1,078 (85.56) | 886 (85.19) | 4,329 (80.98) | 653 (90.07) | 775 (45.48) | 946 (82.98) | 226 (84.96) | 493 (81.49) | 544 (85.94) | 238 (84.10) | 247 (92.51) |  |
| Missing | 3,081 (4.07) | 536 (3.53) | 113 (3.70) | 97 (3.09) | 277 (3.07) | 40 (3.17) | 37 (3.56) | 176 (3.29) | 25 (3.45) | 801 (47.01) | 39 (3.42) | 12 (4.51) | 23 (3.80) | 17 (2.69) | 11 (3.89) | 8 (3.00) |  |
| **Trauma type, n (%)** |  |  |  |  |  |  |  |  |  |  |  |  |  |  |  |  | **<0.0001** |
| Blunt | 71,553 (94.62) | 13,709 (90.18) | 2,788 (91.29) | 2,997 (95.54) | 8,004 (88.63) | 1,145 (90.87) | 958 (92.12) | 4,665 (87.26) | 680 (93.79) | 1,551 (91.02) | 1,035 (90.79) | 244 (91.73) | 537 (88.76) | 562 (88.78) | 254 (89.75) | 241 (90.26) |  |
| Penetrating | 1,671 (2.21) | 869 (5.72) | 127 (4.16) | 57 (1.82) | 448 (4.96) | 66 (5.24) | 48 (4.62) | 367 (6.86) | 32 (4.41) | 81 (4.75) | 52 (4.56) | 17 (6.39) | 40 (6.61) | 43 (6.79) | 17 (6.01) | 13 (4.87) |  |
| Other unspecified | 1,288 (1.70) | 376 (2.47) | 98 (3.21) | 46 (1.47) | 377 (4.17) | 31 (2.46) | 20 (1.92) | 205 (3.83) | 4 (0.55) | 55 (3.23) | 36 (3.16) | 4 (1.50) | 22 (3.64) | 21 (3.32) | 10 (3.53) | 8 (3.00) |  |
| Missing | 1,112 (1.47) | 247 (1.62) | 41 (1.34) | 37 (1.18) | 202 (2.24) | 18 (1.43) | 14 (1.35) | 109 (2.04) | 9 (1.24) | 17 (1.00) | 17 (1.49) | 1 (0.38) | 6 (0.99) | 7 (1.11) | 2 (0.71) | 5 (1.87) |  |
| **Injury Mechanism, n(%)** |  |  |  |  |  |  |  |  |  |  |  |  |  |  |  |  | **<0.0001** |
| Fall | 33,151 (43.84) | 3,466 (22.80) | 1,464 (47.94) | 1,279 (40.77) | 1,884 (20.86) | 318 (25.24) | 235 (22.60) | 784 (14.67) | 295 (40.69) | 404 (23.71) | 221 (19.39) | 48 (18.05) | 100 (16.53) | 104 (16.43) | 50 (17.67) | 52 (19.48) |  |
| Road traffic accidents | 30,287 (40.05) | 7,807 (51.36) | 1,007 (32.97) | 1,407 (44.85) | 3,909 (43.28) | 645 (51.19) | 549 (52.79) | 2,560 (47.89) | 326 (44.97) | 917 (53.81) | 526 (46.14) | 154 (57.89) | 317 (52.40) | 303 (47.87) | 147 (51.94) | 135 (50.56) |  |
| Assault | 8,275 (10.94) | 2,912 (19.16) | 392 (12.84) | 306 (9.75) | 2,259 (25.01) | 220 (17.46) | 201 (19.33) | 1,488 (27.83) | 80 (11.03) | 266 (15.61) | 285 (25.00) | 51 (19.17) | 148 (24.46) | 174 (27.49) | 62 (21.91) | 57 (21.35) |  |
| Other | 2,599 (3.44) | 673 (4.43) | 151 (4.94) | 102 (3.25) | 686 (7.60) | 56 (4.44) | 33 (3.17) | 363 (6.79) | 16 (2.21) | 91 (5.34) | 77 (6.75) | 11 (4.14) | 33 (5.45) | 39 (6.16) | 19 (6.71) | 14 (5.24) |  |
| Missing | 1,312 (1.73) | 343 (2.26) | 40 (1.31) | 43 (1.37) | 293 (3.24) | 21 (1.67) | 22 (2.12) | 151 (2.82) | 8 (1.10) | 26 (1.53) | 31 (2.72) | 2 (0.75) | 7 (1.16) | 13 (2.05) | 5 (1.77) | 9 (3.37) |  |
| **Head AIS, n (%)** |  |  |  |  |  |  |  |  |  |  |  |  |  |  |  |  | **<0.0001** |
| Minor/moderate head injury | 45,571 (60.26) | 9,459 (62.23) | 1,602 (52.46) | 2,031 (64.74) | 5,305 (58.74) | 746 (59.21) | 652 (62.69) | 3,082 (57.65) | 452 (62.34) | 1,227 (72.01) | 678 (59.47) | 170 (63.91) | 371 (61.32) | 383 (60.51) | 177 (62.54) | 181 (67.79) |  |
| Severe head injury | 28,385 (37.53) | 5,3017 (34.91) | 1,381 (45.22) | 1,014 (32.32) | 3,430 (37.98) | 480 (38.10) | 343 (32.98) | 2,050 (38.35) | 253 (34.90) | 452 (26.53) | 409 (35.88) | 84 (31.58) | 220 (36.36) | 227 (35.86) | 97 (34.28) | 80 (29.96) |  |
| Unknown | 1,668 (2.21) | 435 (2.86) | 71 (2.32) | 92 (2.93) | 296 (3.28) | 34 (2.70) | 45 (4.33) | 214 (4.00) | 20 (2.76) | 25 (1.47) | 53 (4.65) | 12 (4.51) | 14 (2.31) | 23 (3.63) | 9 (3.18) | 6 (2.25) |  |
| **Payment Method, n(%)** |  |  |  |  |  |  |  |  |  |  |  |  |  |  |  |  | **<0.0001** |
| Public | 33,211 (43.92) | 5,607 (36.89) | 1,462 (47.87) | 1,495 (47.66) | 4,324 (47.88) | 488 (38.,73) | 418 (40.19) | 2,400 (44.89) | 359 (49.52) | 705 (41.37) | 595 (52.19) | 115 (43.23) | 241 (39.83) | 322 (50.87) | 151 (53.36) | 127 (47.57) |  |
| Private | 29,039 (38.40) | 5,822 (38.30) | 1,078 (35.33) | 1,165 (37.14) | 2,358 (26.11) | 487 (38.65) | 378 (36.35) | 1,388 (25.96) | 260 (35.86) | 716 (42.02) | 292 (25.61) | 92 (34.59) | 173 (28.60) | 146 (23.06) | 78 (27.56) | 77 (28.84) |  |
| Uninsured | 8,570 (11.13) | 2,866 (18.85) | 379 (12.41) | 328 (10.46) | 1,790 (19.82) | 232 (18.41) | 203 (19.52) | 1,287 (24.07) | 78 (10.76) | 174 (10.21) | 205 (17.98) | 47 (17.67) | 164 (27.11) | 135 (21.33) | 40 (14.13) | 53 (19.85) |  |
| Other | 3,416 (4.52) | 677 (4.45) | 100 (3.27) | 115 (3.67) | 430 (4.76) | 42 (3.33) | 29 (2.79) | 200 (3.74) | 24 (3.31) | 35 (2.05) | 36 (3.16) | 9 (3.38) | 16 (2.64) | 17 (2.69) | 10 (3.53) | 9 (3.37) |  |
| Missing | 1,388 (1.84) | 229 (1.51) | 34 (1.11) | 34 (1.08) | 129 (1.43) | 11 (0.87) | 12 (1.15) | 71 (1.33) | 4 (0.55) | 74 (4.34) | 12 (1.05) | 3 (1.13) | 11 (1.82) | 13 (2.05) | 4 (1.41) | 1 (0.37) |  |
| **Comorbidities (Yes), n(%)** |  |  |  |  |  |  |  |  |  |  |  |  |  |  |  |  |  |
| Psychiatric | 8,765 (11.59) | 2,048 (13.47) | 634 (20.76) | 374 (11.92) | 1,535 (17.00) | 241 (19.13) | 152 (14.62) | 823 (15.39) | 159 (21.93) | 233 (13.67) | 186 (16.32) | 56 (21.05) | 121 (20.00) | 96 (15.17) | 64 (22.61) | 57 (21.35) | **<0.0001** |
| Alcohol Use Disorder | 7,482 (9.89) | 1,626 (10.70) | 591 (19.35) | 279 (8.89) | 1,253 (13.87) | 189 (15.00) | 103 (9.90) | 522 (9.76) | 101 (13.93) | 212 (12.44) | 106 (9.30) | 29 (10.90) | 58 (9.59) | 69 (10.90) | 21 (7.42) | 24 (8.99) | **<0.0001** |
| Disseminated Cancer | 470 (0.62) | 22 (0.14) | 16 (0.52) | 32 (1.02) | 13 (0.14) | 2 (0.16) | 7 (0.67) | 5 (0.09) | 6 (0.83) | 5 (0.29) | 3 (0.26) | 3 (1.13) | 0 | 0 | 0 | 0 | **<0.0001** |
| COPD | 3,692 (4.88) | 398 (2.62) | 238 (7.79) | 241 (7.68) | 309 (3.42) | 38 (3.02) | 37 (3.56) | 109 (2.04) | 72 (9.93) | 108 (6.34) | 47 (4.12) | 19 (7.14) | 15 (2.48) | 14 (2.21) | 12 (4.24) | 7 (2.62) | **<0.0001** |
| Cardiovascular | 25,463 (33.67) | 1,936 (12.74) | 997 (32.65) | 1,150 (36.66) | 1,762 (19.51) | 157 (12.46) | 172 (16.54) | 531 (9.93) | 262 (36.14) | 401 (23.53) | 227 (19.91) | 45 (16.92) | 58 (9.59) | 70 (11.06) | 44 (15.55) | 41 (15.36) | **<0.0001** |
| Diabetes Mellitus | 10,549 (13.95) | 580 (3.82) | 361 (11.82) | 468 (14.92) | 649 (7.19) | 35 (2.78) | 51 (4.90) | 182 (3.40) | 100 (13.79) | 136 (7.98) | 75 (6.58) | 11 (4.14) | 21 (3.47) | 25 (3.95) | 12 (4.24) | 7 (2.62) | **<0.0001** |
| Chronic Renal Failure | 753 (1.00) | 31 (0.20) | 18 (0.59) | 41 (1.31) | 30 (0.33) | 2 (0.16) | 2 (0.19) | 5 (0.09) | 8 (1.10) | 14 (0.82) | 3 (0.26) | 0 | 0 | 3 (0.47) | 1 (0.35) | 0 | **<0.0001** |
| Smoking | 13,655 (18.06) | 5,441 (35.79) | 772 (25.28) | 737 (23.49) | 3,607 (29.94) | 467 (37.06) | 411 (39.52) | 2,557 (47.83) | 235 (32.41) | 629 (36.91) | 548 (48.07) | 107 (40.23) | 296 (48.93) | 324 (51.18) | 133 (47.00) | 126 (47.19) | **<0.0001** |
| Substance Use Disorder | 3,274 (4.33) | 3,080 (20.26) | 343 (11.23) | 274 (8.73) | 2,845 (31.50) | 286 (22.70) | 269 (25.87) | 1,868 (34.94) | 135 (18.62) | 350 (20.54) | 463 (40.61) | 88 (33.08) | 244 (40.33) | 271 (42.81) | 135 (47.70) | 96 (35.96) | **<0.0001** |
| Anticoagulant therapy | 7,929 (10.48) | 342 (2.25) | 252 (8.25) | 315 (10.04) | 227 (2.51) | 27 (2.14) | 37 (3.56) | 66 (1.23) | 68 (9.38) | 78 (4.58) | 27 (2.37) | 5 (1.88) | 9 (1.49) | 8 (1.26) | 5 (1.77) | 5 (1.87) | **<0.0001** |
| Bleeding disorder | 988 (1.31) | 84 (0.55) | 50 (1.64) | 67 (2.14) | 52 (0.58) | 10 (0.79) | 7 (0.67) | 12 (0.22) | 14 (1.93) | 7 (0.41) | 9 (0.79) | 2 (0.75) | 4 (0.66) | 2 (0.32) | 0 | 3 (1.12) | **<0.0001** |
| Cirrhosis | 1,021 (1.35) | 117 (0.77) | 71 (2.32) | 50 (1.59) | 117 (1.30) | 18 (1.43) | 5 (0.48) | 36 (0.67) | 21 (2.90) | 22 (1.29) | 11 (0.96) | 7 (2.63) | 5 (0.83) | 6 (0.95) | 3 (1.06) | 3 (1.12) | **<0.0001** |
| Age, Mean (SD) | 51.70 (20.57) | 35.35 (15.03) | 50.78 (18.06) | 51.60 (19.30) | 42.74 (14.15) | 34.74 (14.77) | 37.15 (14.95) | 36.19 (12.48) | 51.03 (16.49) | 43.03 (16.98) | 41.84 (12.60) | 37.09 (14.96) | 32.72 (11.69) | 36.41 (12.09) | 40.27 (12.44) | 37.27 (14.19) | **<0.0001** |
| Pulse rate, Mean (SD) | 89.49 (19.31) | 90.30 (20.71) | 91.47 (20.57) | 89.54 (18.53) | 93.51 (20.45) | 93.68 (21.29) | 89.13 (19.50) | 91.93 (20.69) | 91.56 (19.67) | 92.57 (19.90) | 90.95 (20.19) | 86.59 (19.95) | 93.99 (22.21) | 90.41 (20.14) | 92.84 (21.26) | 92.16 (22.03) | **<0.0001** |
| Systolic Blood Pressure, Mean (SD) | 142.79 (26.43) | 137.42 (23.70) | 138.11 (27.31) | 142.14 (25.00) | 139.58 (25.31) | 134.63 (23.33) | 137.52 (22.09) | 137.26 (23.46) | 138.84 (26.35) | 138.39 (24.12) | 138.60 (23.58) | 133.06 (25.43) | 134.56 (24.32) | 135.56 (23.29) | 133.18 (25.33) | 136.86 (21.35) | **<0.0001** |
| Injury Severity Score, Median (IQR) | 9 (5 - 14) | 9 (5 - 13) | 9 (5 - 16) | 9 (5 - 12) | 9 (5 - 14) | 9 (5 - 14) | 9 (5 - 12) | 9 (5 - 14) | 9 (5 - 12) | 6 (5 - 10) | 9 (5 - 13) | 8 (5 - 12) | 9 (5 - 14) | 9 (5 - 13) | 9 (5 - 12) | 9 (5 - 12) | **<0.0001** |
| Total GCS, Median (IQR) | 15 (14 - 15) | 15 (14 - 15) | 14 (12 - 15) | 15 (14 - 15) | 15 (14 - 15) | 14 (12 - 15) | 15 (14 - 15) | 15 (14 - 15) | 15 (14 - 15) | 15 914 - 15) | 15 914 - 15) | 15 (14 - 15) | 14 (11 - 15) | 15 (14 - 15) | 15 (13 - 15) | 15 (14 - 15) | **<0.0001** |
| Blood alcohol concentration, Mean (SD) | 0.06 (0.11) | 0.07 (0.11) | 0.08 (0.13) | 0.04 (0.09) | 0.07 (0.11) | 0.07 (0.12) | 0.05 (0.10) | 0.06 (0.10) | 0.05 (0.10) | 0.05 (0.10) | 0.03 (0.08) | 0.04 (0.09) | 0.03 (0.08) | 0.03 (0.07) | 0.02 (0.06) | 0.04 (0.10) | **<0.0001** |

Chi-square tests were conducted for categorical variables, and ANOVA was conducted for continuous variables

Abbreviations: COPD (Chronic Obstructive Pulmonary Disorder), GCS (Glasgow Coma Scale), IQR (Interquartile range), SD (Standard deviation)

NS (No substance), C (Cannabinoids), D (Depressants), O (Opioids), S (Stimulants), CD (Cannabinoids + depressants), CO (Cannabinoids + opioids), CS (Cannabinoids + stimulants), OD (Opioids + depressants), SD (Stimulants + depressants), SO (Stimulants + opioids), COD (Cannabinoids + opioids + depressants), CSD (Cannabinoids + stimulants + depressants), CSO (Cannabinoids + stimulants + opioids), SOD (Stimulants + opioids + depressants), CSOD (Cannabinoids + stimulants + opioids + depressants)

Table S2: Between Group Comparison of Outcomes in Isolated Traumatic Brain Injury Patients

| **Groups** | **Mortality (Dead) n (%)** | **TBI severity (Severe TBI) n (%)** | **Hospital length of stay**  **Mean (SD)** | **Total ICU Days**  **Mean (SD)** | **Total mechanical ventilator days**  **Mean (SD)** |
| --- | --- | --- | --- | --- | --- |
| **Polysubstance Use by Number of Substances** | | | | | |
| No Substance | 3,368 (4.45) | 28,385 (38.38) | 5.40 (8.60) | 4.62 (5.92) | 5.39 (6.71) |
| One substance | 1.150 (3.99) | 10,539 (37.67) | 5.54 (8.52) | 4.67 (5.85) | 4.87 (6.31) |
| Two Substances | 409 (3.83) | 4,005 (38.90) | 5.52 (8.65) | 4.53 (5.45) | 4.60 (6.02) |
| ≥Three Substances | 135 (3.22) | 1,283 (31.54) | 5.18 (7.89) | 4.56 (5.25) | 4.74 (6.15) |
| p-value | **<0.0001** | **<0.0001** | **0.02** | 0.51 | **<0.0001** |
| **Polysubstance Use by Type of Substances** | | | | | |
| No Substance | 3,368 (4.45) | 28,385 (34.38) | 5.40 (8.60) | 4.62 (5.92) | 5.39 (6.71) |
| **One Substances** |  |  |  |  |  |
| Cannabinoids | 581 (3.82) | 5,307 (35.94) | 5.07 (7.87) | 4.65 (5.98) | 4.82 (6.54) |
| Depressants | 196 (6.42) | 1,381 (46.30) | 6.52 (8.79) | 4.80 (5.62) | 4.46 (5.18) |
| Opioids | 81 (2.58) | 1,014 (33.30) | 5.19 (7.03) | 4.11 (4.93) | 5.21 (8.25) |
| Stimulants | 356 (3.94) | 3,430 (39.27) | 6.27 (10.45) | 4.77 (5.84) | 5.09 (6.10) |
| **Two Substances** |  |  |  |  |  |
| Cannabinoids and Depressants | 60 (4.76) | 480 (39.15) | 5.69 (9.45) | 4.67 (5.99) | 4.44 (6.85) |
| Cannabinoids and Opioids | 31 (2.98) | 343 (34.47) | 4.41 (4.93) | 3.70 (3.79) | 4.32 (4.27) |
| Cannabinoids and Stimulants | 201 (3.76) | 2,050 (39.95) | 5.38 (8.03) | 4.61 (5.73) | 4.59 (6.06) |
| Opioids and Depressants | 27 (3.72) | 253 (35.89) | 5.67 (7.18) | 4.41 (4.58) | 4.56 (4.32) |
| Stimulants and Depressants | 56 (3.29) | 452 (26.92) | 4.90 (6.95) | 4.61 (5.42) | 4.40 (5.36) |
| Stimulants and Opioids | 27 (2.37) | 409 (37.63) | 5.51 (8.42) | 4.44 (4.92) | 4.96 (4.97) |
| **≥ Three Substances** |  |  |  |  |  |
| Cannabinoids, Opioids and Depressants | 8 (3.01) | 84 (33.07) | 4.51 (4.45) | 4.15 (4.48) | 4.24 (5.00) |
| Cannabinoids, Stimulants and Depressants | 30 (4.96) | 220 (37.23) | 5.64 (8.17) | 4.84 (6.10) | 4.64 (6.65) |
| Cannabinoids, Stimulants and Opioids | 20 (3.16) | 227 (37.21) | 5.29 (7.25) | 4.75 (5.53) | 5.75 (7.19) |
| Stimulants, Opioids and Depressants | 11 (3.89) | 97 (35.40) | 6.14 (8.58) | 4.92 (5.27) | 5.95 (7.48) |
| Cannabinoids, Stimulants, Opioids and Depressants | 9 (3.37) | 80 (30.65) | 5.98 (12.65) | 4.37 (4.30) | 4.41 (6.29) |
| p-value | **<0.0001** | **<0.0001** | **<0.0001** | **0.001** | **<0.0001** |

Chi-square tests were conducted for categorical variables, and ANOVA was conducted for continuous variables

Table S3: Adjusted Odds of Mortality and Severe TBI For Non-isolated Traumatic Brain Injury Patients.

|  | Mortalitya | | TBI Severityb | |
| --- | --- | --- | --- | --- |
| Groups | OR (95% CI) | p-value | OR (95% CI) | p-value |
| **Polysubstance Use by Number of Substances** | | | | |
| No Substance | Ref. | Ref. | Ref. | Ref. |
| One substance | 0.95 (0.89 - 1.03) | 0.2 | 1.07 (1.04 - 1.10) | **<0.0001** |
| Two Substances | 0.90 (0.80 - 1.00) | 0.05 | 1.09 (1.04 - 1.14) | **<0.0001** |
| ≥Three Substances | 0.75 (0.63 - 0.80) | **0.001** | 0.78 (0.73 - 0.83) | **<0.0001** |
| **Polysubstance Use by Type of Substances** | | | | |
| No Substance | Ref. | Ref. | Ref. | Ref. |
| **One substance** |  |  |  |  |
| Cannabinoids | 1.03 (0.94 - 1.13) | 0.54 | 1.10 (1.06 - 1.14) | **<0.0001** |
| Depressants | 0.75 (0.64 - 0.87) | **0.0003** | 1.06 (0.99 - 1.14) | 0.11 |
| Opioids | 0.91 (0.73 - 1.13) | 0.37 | 0.92 (0.85 - 0.98) | **0.02** |
| Stimulants | 1.01 (0.90 - 1.12) | 0.93 | 1.10 (1.05 - 1.15) | **<0.0001** |
| **Two substances** |  |  |  |  |
| Cannabinoids and Depressants | 0.80 (0.62 - 1.04) | 0.1 | 1.03 (0.92 - 1.15) | 0.66 |
| Cannabinoids and Opioids | 1.29 (0.89 - 1.88) | 0.18 | 1.09 (0.96 - 1.24) | 0.17 |
| Cannabinoids and Stimulants | 0.93 (0.80 - 1.07) | 0.31 | 1.18 (1.11 - 1.25) | **<0.0001** |
| Opioids and Depressants | 0.64 (0.42 - 0.97) | **0.003** | 0.83 (0.71 - 0.96) | **0.01** |
| Stimulants and Depressants | 0.67(0.52 - 0.87) | **0.003** | 0.60 (0.54 - 0.67) | **<0.0001** |
| Stimulants and Opioids | 0.93 (0.65 - 1.32) | 0.67 | 1.08 (0.96 - 1.21) | 0.21 |
| **≥Three substances** |  |  |  |  |
| Cannabinoids, Opioids and Depressants | 0.54 (0.26 - 1.11) | 0.09 | 0.81 (0.63 - 1.05) | 0.11 |
| Cannabinoids, Stimulants and Depressants | 0.56 (0.38 - 0.84) | **0.005** | 0.84 (0.72 - 0.99) | **0.04** |
| Cannabinoids, Stimulants and Opioids | 1.37 (0.88 - 2.13) | **0.17** | 1.07 (0.91 - 1.25) | 0.43 |
| Stimulants, Opioids and Depressants | 0.99 (0.57 - 1.73) | 0.97 | 0.93 (0.74 - 1.17) | 0.54 |
| Cannabinoids, Stimulants, Opioids and Depressants | 0.69 (0.33 - 1.44) | 0.32 | 0.85 (0.66 - 1.08) | 0.18 |

aModel was adjusted for age, sex, race, ethnicity, trauma type, injury mechanism, payment method, comorbidities (psychiatric, AUD, COPD, cardiovascular, diabetes, cancer, smoking status, renal, anticoagulant use, bleeding, cirrhosis, SUD, pulse rate, SBP, BAC, head AIS, chest AIS, face AIS, neck AIS, abdomen AIS, spine AIS, upper extremity AIS, lower extremity AIS, and total GCS.

bModel was adjusted for age, sex, race, ethnicity, trauma type, injury mechanism, payment method, comorbidities (psychiatric, AUD, COPD, cardiovascular, diabetes, cancer, smoking status, renal, anticoagulant use, bleeding, cirrhosis, SUD, pulse rate, SBP, chest AIS, face AIS, neck AIS, external AIS, spine AIS, upper extremity AIS, lower extremity AIS, and total GCS.

Table S4: Adjusted Negative Binomial Regression Analysis of Health Resource Utilization in Non-isolated Traumatic Brain Injury Patients.

|  | Hospital Length of Stay (HLOS)a | | ICU Length of Stay (ICULOS)b | | Total Ventilator Days (TVD)c | |
| --- | --- | --- | --- | --- | --- | --- |
| Groups | Estimate | p-value | Estimate | p-value | Estimate | p-value |
| **Polysubstance Use by Number of Substances** | | | | | | |
| No Substance | Ref. | Ref. | Ref. | Ref. | Ref. | Ref. |
| One substance | 0.02 | **<0.0001** | 0.002 | 0.85 | -0.03 | **0.02** |
| Two Substances | 0.03 | **0.0002** | -0.02 | 0.06 | -0.04 | 0.05 |
| ≥Three Substances | 0.02 | **0.047** | -0.03 | 0.14 | -0.04 | 0.18 |
| **Polysubstance Use by Type of Substances** | | | | | | |
| No Substance | Ref. | Ref. | Ref. | Ref. | Ref. | Ref. |
| **One substance** |  |  |  |  |  |  |
| Cannabinoids | -0.03 | **<0.0001** | -0.01 | 0.17 | -0.05 | **0.003** |
| Depressants | 0.07 | **<0.0001** | 0.03 | 0.17 | -0.07 | **0.01** |
| Opioids | 0.04 | **0.01** | -0.06 | **0.01** | -0.02 | 0.67 |
| Stimulants | 0.1 | **<0.0001** | 0.03 | **0.03** | 0.01 | **0.78** |
| **Two substances** |  |  |  |  |  |  |
| Cannabinoids and Depressants | 0.02 | 0.32 | -0.02 | 0.53 | -0.02 | 0.57 |
| Cannabinoids and Opioids | -0.07 | **0.002** | -0.19 | **<0.0001** | -0.1 | 0.16 |
| Cannabinoids and Stimulants | 0.01 | 0.62 | -0.01 | 0.77 | -0.06 | **0.01** |
| Opioids and Depressants | 0.09 | **0.001** | 0.03 | 0.38 | 0.1 | 0.17 |
| Stimulants and Depressants | 0.01 | 0.48 | -0.001 | 0.96 | 0.02 | 0.63 |
| Stimulants and Opioids | 0.09 | **<0.0001** | -0.02 | 0.61 | -0.01 | 0.88 |
| **≥Three substances** |  |  |  |  |  |  |
| Cannabinoids, Opioids and Depressants | -0.06 | 0.17 | -0.1 | 0.14 | -0.17 | 0.15 |
| Cannabinoids, Stimulants and Depressants | 0.01 | 0.77 | -0.01 | 0.77 | -0.08 | 0.16 |
| Cannabinoids, Stimulants and Opioids | 0.01 | 0.75 | -0.06 | 0.18 | 0.004 | 0.96 |
| Stimulants, Opioids and Depressants | 0.1 | **0.02** | 0.08 | 0.19 | 0.11 | 0.18 |
| Cannabinoids, Stimulants, Opioids and Depressants | 0.06 | 0.19 | -0.06 | 0.37 | -0.12 | 0.29 |

aModel was adjusted for age, sex, race, trauma type, injury mechanism, payment method, comorbidities (psychiatric, AUD, COPD, cardiovascular, diabetes, cancer, renal, anticoagulant use, bleeding, cirrhosis, SUD, pulse rate, SBP, BAC, head AIS, chest AIS, face AIS, neck AIS, abdomen AIS, spine AIS, upper extremity AIS, lower extremity AIS, external AIS, and total GCS.

bModel was adjusted for age, sex, race, ethnicity, injury mechanism, payment method, comorbidities (psychiatric, AUD, COPD, cardiovascular, diabetes, smoking status, renal, anticoagulant use, cirrhosis, SUD, pulse rate, SBP, BAC, head AIS, face AIS, neck AIS, abdomen AIS, spine AIS, upper extremity AIS, lower extremity AIS, external AIS, and total GCS.

cModel was adjusted for age, sex, race, ethnicity, trauma type, injury mechanism, payment method, comorbidities (psychiatric, COPD, cardiovascular, diabetes, smoking status, renal, bleeding, cirrhosis, pulse rate, SBP, BAC, head AIS, face AIS, neck AIS, abdomen AIS, spine AIS, upper extremity AIS, lower extremity AIS, external AIS, and total GCS.
